# Supplementary material for: Potential of machine learning to predict early ischemic events after carotid endarterectomy or stenting: A comparison with surgeon predictions
Source: bioRxiv or medRxiv preprint supplement (doi:10.1101/2020.11.16.20231639), 2021-04-28
Supplement: Supplementary file [file media-1.pdf]

## Supplementary Information

### **Article title**

Potential of machine learning to predict early ischemic events after carotid endarterectomy or stenting: A comparison with surgeon predictions

### **Journal name**

Neurosurgical Review

### **Author names**

Kazuya Matsuo, Atsushi Fujita, Kohkichi Hosoda, Jun Tanaka, Taichiro Imahori, Taiji Ishii, Masaaki Kohta, Kazuhiro Tanaka, Yoichi Uozumi, Hidehito Kimura, Takashi Sasayama, Eiji Kohmura.

### **Affiliation and e-mail address of the corresponding author**

Kazuya Matsuo, MD, PhD, Department of Neurosurgery, Kobe University Graduate School of Medicine, Kobe, Japan. E-mail: [kkmatsuo@outlook.jp](mailto:kkmatsuo@outlook.jp)

---

Supplemental Table 1. Patient characteristics of CEA group and CAS group.

| Variable                                      | CEA group<br>(n=95) | CAS group<br>(n=70) | <i>p</i> value |
|-----------------------------------------------|---------------------|---------------------|----------------|
| Age, year, mean (SD)                          | 74.0 (8.22)         | 74.5 (6.74)         | 0.70           |
| pre-treatment mRS, median [IQR]               | 0 [0-1]             | 0 [0-2]             | 0.41           |
| LDL-cholesterol, mg/dL, mean (SD)             | 89.7 (32.7)         | 90.7 (23.9)         | 0.83           |
| Prior medical histories, n (%)                |                     |                     |                |
| Hypertension                                  | 84 (88)             | 52 (74)             | 0.02           |
| Diabetes mellitus                             | 30 (32)             | 28 (40)             | 0.32           |
| Arteriosclerotic disease                      | 36 (38)             | 35 (50)             | 0.15           |
| Anatomical and pathophysiological features    |                     |                     |                |
| Contralateral occlusion, n (%)                | 9 (9.5)             | 5 (7.1)             | 0.78           |
| Stenosis at a high position, n (%)            | 8 (8.4)             | 5 (7.1)             | 1              |
| Type III Aorta, n (%)                         | 33 (35)             | 31 (44)             | 0.26           |
| ICA-PSV, cm/sec, mean (SD)                    | 259 (125)           | 294 (132)           | 0.09           |
| Mobile plaque, n (%)                          | 14 (15)             | 5 (7.1)             | 0.15           |
| Plaque ulceration, n (%)                      | 33 (35)             | 6 (8.6)             | <0.0001        |
| Plaque with hyperintense signal on TOF, n (%) | 43 (45)             | 18 (26)             | 0.01           |
| Previous neck irradiation, n (%)              | 7 (7.4)             | 8 (11)              | 0.42           |
| Symptomatic, n (%)                            | 45 (47)             | 19 (27)             | 0.01           |
| Crescendo TIA or stroke in evolution, n (%)   | 3 (3.2)             | 7 (10)              | 0.10           |
| Outcome, n (%)                                |                     |                     |                |
| Ischemic stroke within 30 days                | 20 (21)             | 26 (37)             | 0.03           |
| Major ischemic stroke                         | 3 (3.2)             | 0 (0)               | 0.27           |
| Minor ischemic stroke                         | 0 (0)               | 3 (4.3)             | 0.07           |
| Asymptomatic DWI hyperintense lesions         | 17 (18)             | 23 (33)             | 0.04           |

CAS = carotid artery stenting; CEA = carotid endarterectomy; DWI = diffusion weighted imaging; IQR = interquartile range; LDL = low density lipoprotein; mRS = modified Rankin scale; ICA-PSV = internal carotid artery-peak systolic velocity; TIA = transient ischemic attack; TOF = time-of-flight.

Supplemental table 2. Optimized hyperparameters of five machine learning models

| Model               | Hyperparameters                                                                                                                                                                                                                                                                   |
|---------------------|-----------------------------------------------------------------------------------------------------------------------------------------------------------------------------------------------------------------------------------------------------------------------------------|
| XGBoost             | learning_rate = 0.3<br>n_estimators = 360<br>max_depth = 1<br>min_child_weight = 6.5<br>gamma = 0.95<br>subsample = 0.65<br>colsample_bytree = 0.65<br>objective = 'binary:logistic'<br>reg_alpha = 0.001<br>reg_lambda = 0.1<br>max_delta_step = 1<br>early_stopping_rounds = 20 |
| Random forest       | criterion = 'entropy'<br>max_depth = 4<br>max_features = 4<br>min_samples_leaf = 0.0001<br>min_samples_split = 0.0001<br>n_estimators = 40                                                                                                                                        |
| Logistic regression | penalty = 'l2'<br>C = 0.05<br>solver = 'saga'                                                                                                                                                                                                                                     |
| SVM                 | kernel = 'linear'<br>C = 2.5<br>coef0 = 0<br>degree = 1<br>gamma = 0.0001<br>probability = True                                                                                                                                                                                   |

|                |                                                                                                                                                                                                                                                                                                                                                                                                                                                      |
|----------------|------------------------------------------------------------------------------------------------------------------------------------------------------------------------------------------------------------------------------------------------------------------------------------------------------------------------------------------------------------------------------------------------------------------------------------------------------|
| Neural Network | <pre>models.Sequential() model.add(layers.Dense(16, activation='relu', input_shape=(17,))) model.add(layers.Dropout(0.2)) model.add(layers.BatchNormalization()) model.add(layers.Dense(16, activation='relu')) model.add(layers.Dropout(0.2)) model.add(layers.BatchNormalization()) model.add(layers.Dense(1, activation='sigmoid'))  EarlyStopping (patience=20, restore_best_weights=True) optimizer=Adam (lr=0.01) batch_size=8 epochs=41</pre> |
|----------------|------------------------------------------------------------------------------------------------------------------------------------------------------------------------------------------------------------------------------------------------------------------------------------------------------------------------------------------------------------------------------------------------------------------------------------------------------|

SVM = support vector machine

\* A subset of the program code generated for this study is available at GitHub and can be accessed at [BLINDED FOR REVIEW].
